# Supplementary material for: Curcumol inhibits breast cancer growth via NCL/ERα36 and the PI3K/AKT pathway
Source: Royal Society of Chemistry journal article supplement (doi:10.1039/d2fo02387c), 2022-11-23
Supplement: d2fo02387c1.pdf [file d2fo02387c1.pdf]

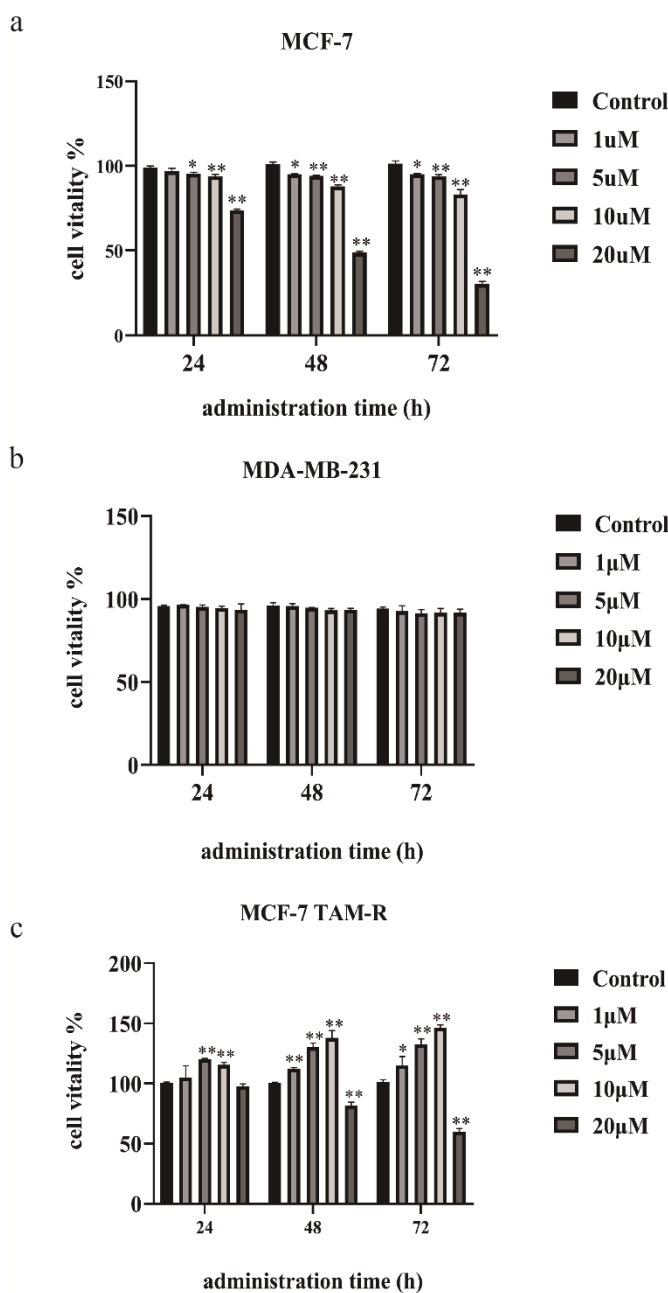

**Fig s1 The effect of tamoxifen on breast cancer cells proliferation** Cell viability of different concentrations of TAM on breast cancer MCF-7(a), MDA-MB-231(b) and MCF-7 TAM-R cells(c) were detected by MTT assay at 24, 48, 72 h. \* $P < 0.05$ , \*\* $P < 0.01$  vs. Control group

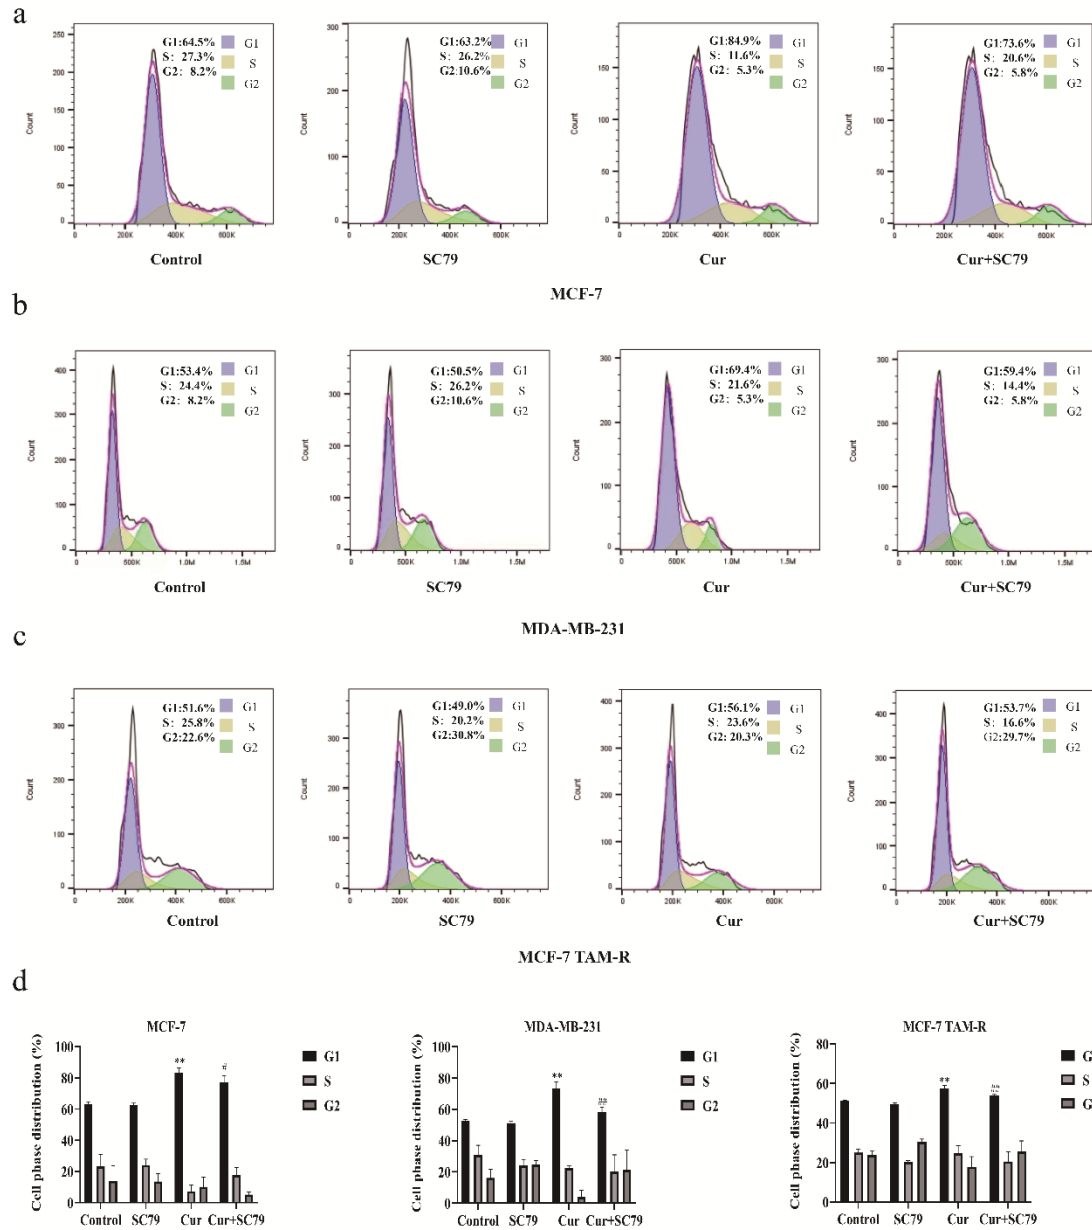

**Fig s2 The cell cycle effects of curcumol alone and in combination with AKT activator SC79 on breast cancer cells.** (a) The cell cycle effects of Curcumol alone and in combination with AKT activator SC79 on MCF-7 cells. (b) The cell cycle effects of Curcumol alone and in combination with AKT activator SC79 on MDA-MB-231 cells. (c) The cell cycle effects of Curcumol alone and in combination with AKT activator SC79 on MCF-7 TAM-R cells. ( $P^* < 0.05$ ,  $P^{**} < 0.01$ , vs. Control;  $P^\# < 0.05$ ,  $P^{\#\#} < 0.01$ , vs. Cur group.)
